# Supplementary material
Source: Springer Nature journal article supplement (https://www.springermedizin.de/resource/supplementary/13053_2010_152_MOESM5_ESM.pdf/9674326)

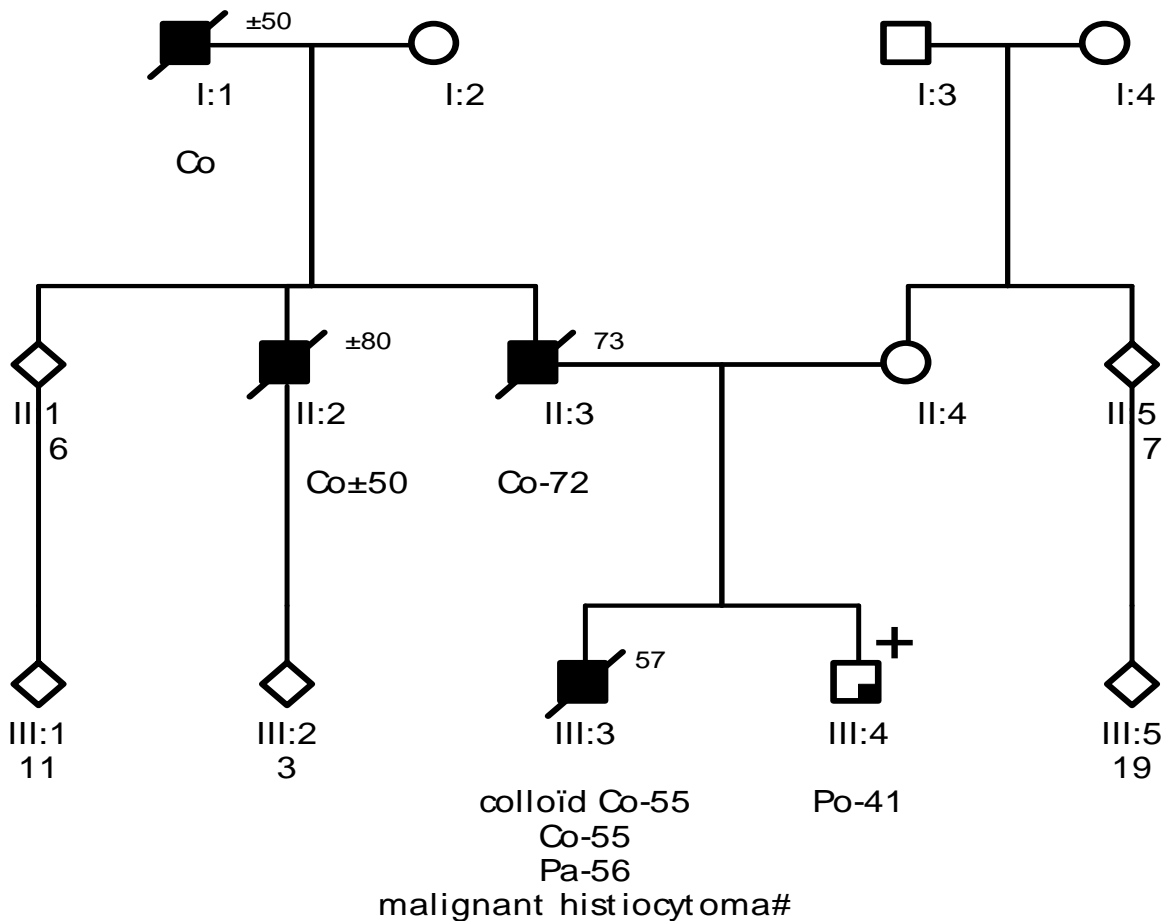

Supplement: MOESM5 [file 9674326]
